# Supplementary material
Source: PubMed Central journal article supplement (PMC4145113)
Supplement: supp_tpc.114.126391_tpc126391_SupplementalData.pdf [file supp_tpc.114.126391_tpc126391_SupplementalData.pdf]

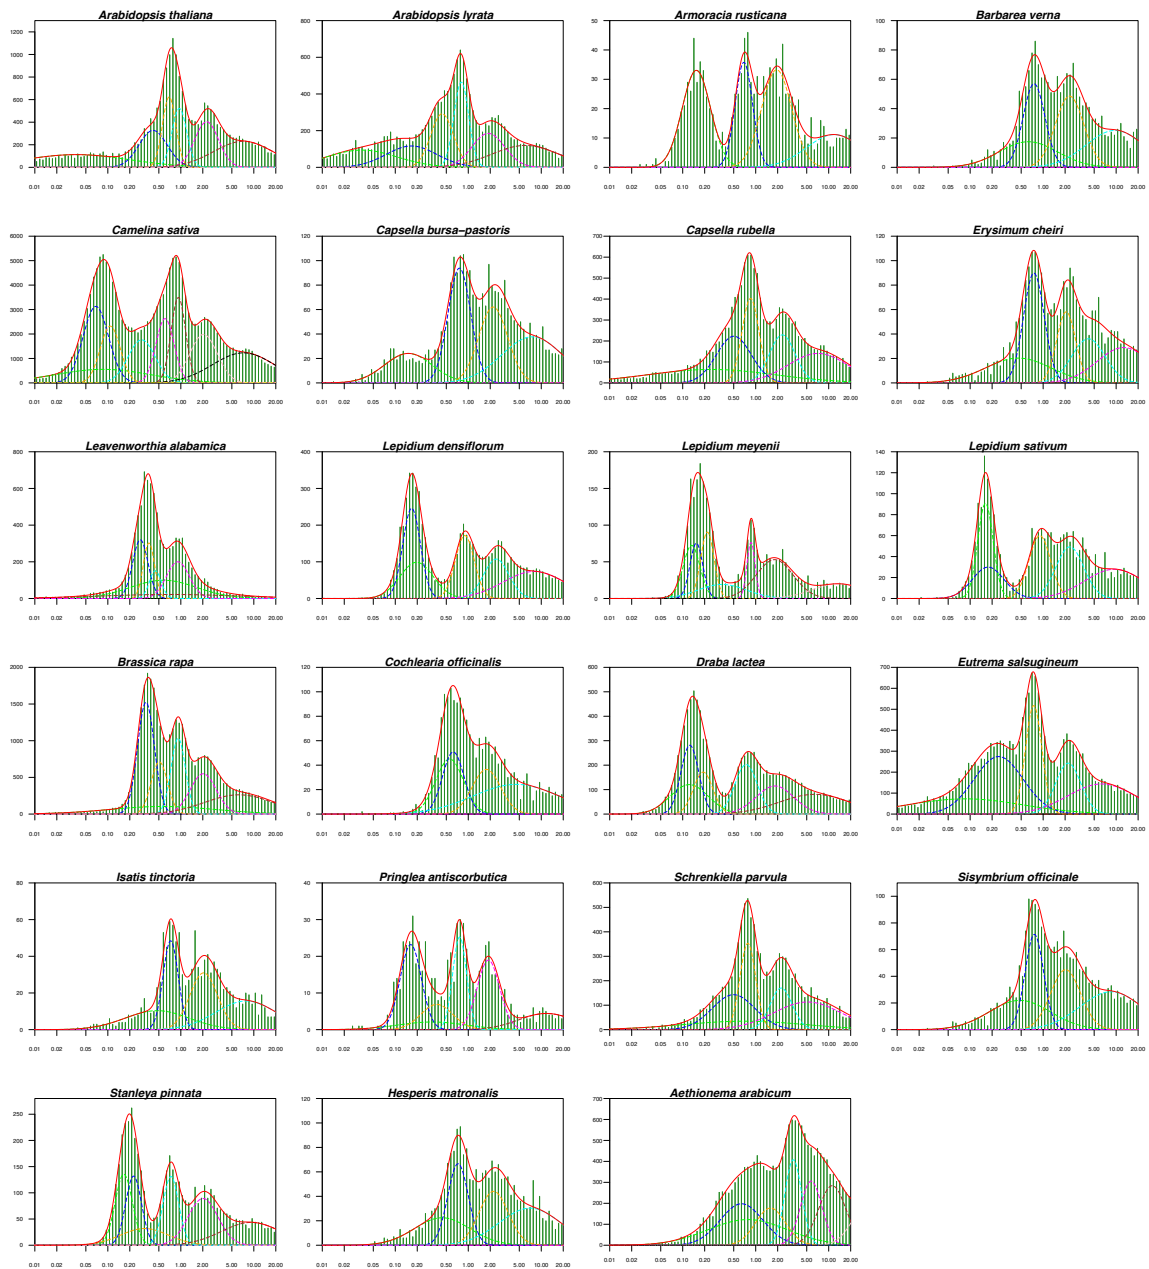

Supplemental Figure 1. Histograms of frequency distributions of  $K_s$  values obtained by comparing pairs of paralogous genes of 23 Brassicaceae species. Values on the X- and Y-axes represent synonymous distance ( $K_s$ ) and number of duplicates, respectively. The red line in each histogram represents mixture model fitted with normal distribution components. The dotted lines represent the individual Gaussian components. The complete list of mixture model Gaussian components is provided in Supplemental Dataset 1. Major polyploidy events inferred from each distribution and their estimated ages are listed in Supplemental Table 4.

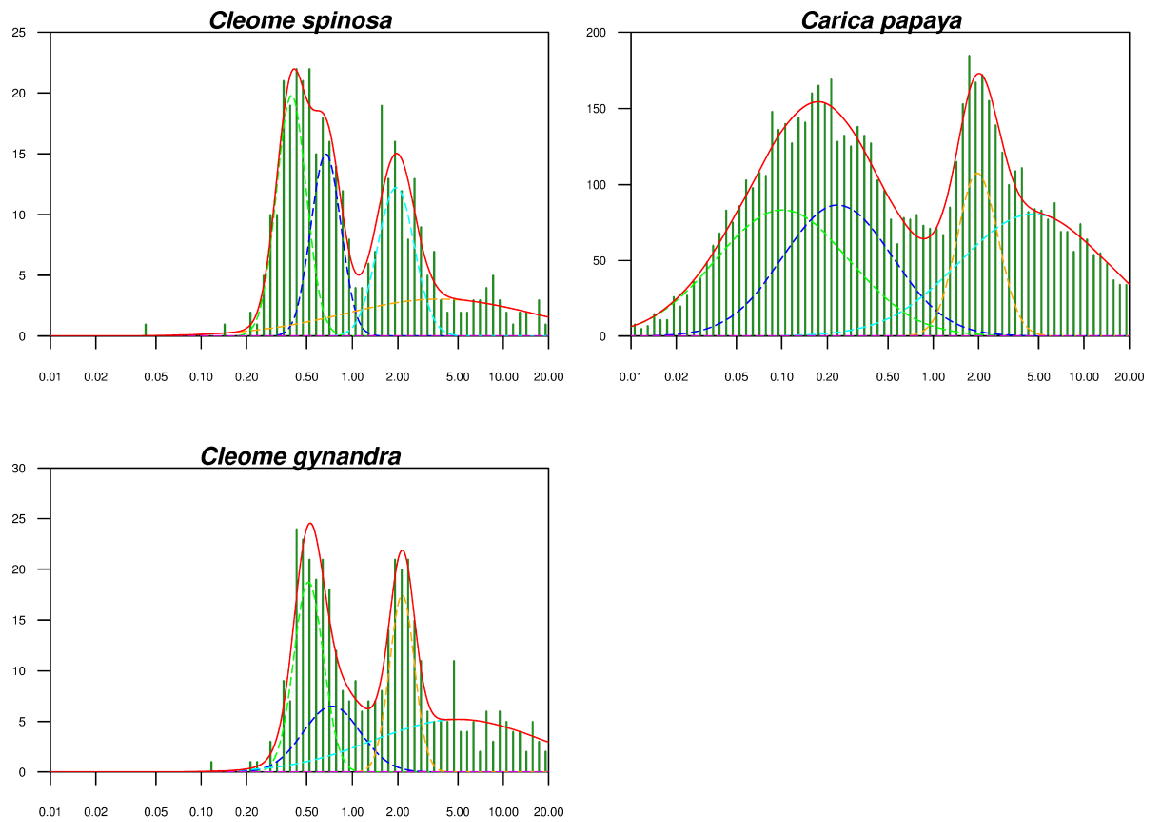

Supplemental Figure 2. Age distributions of duplicated genes in Cleomaceae and Caricaceae species

Histograms of frequency distributions of  $K_s$  values comparing pairs of paralogous genes of *Cleome* species and *Carica papaya* are shown. Values on the X- and Y-axes represent synonymous distance ( $K_s$ ) and number of duplicates, respectively. The red line in each histogram represents mixture model fitted with normal distribution components and the dotted lines represent the individual Gaussian components.

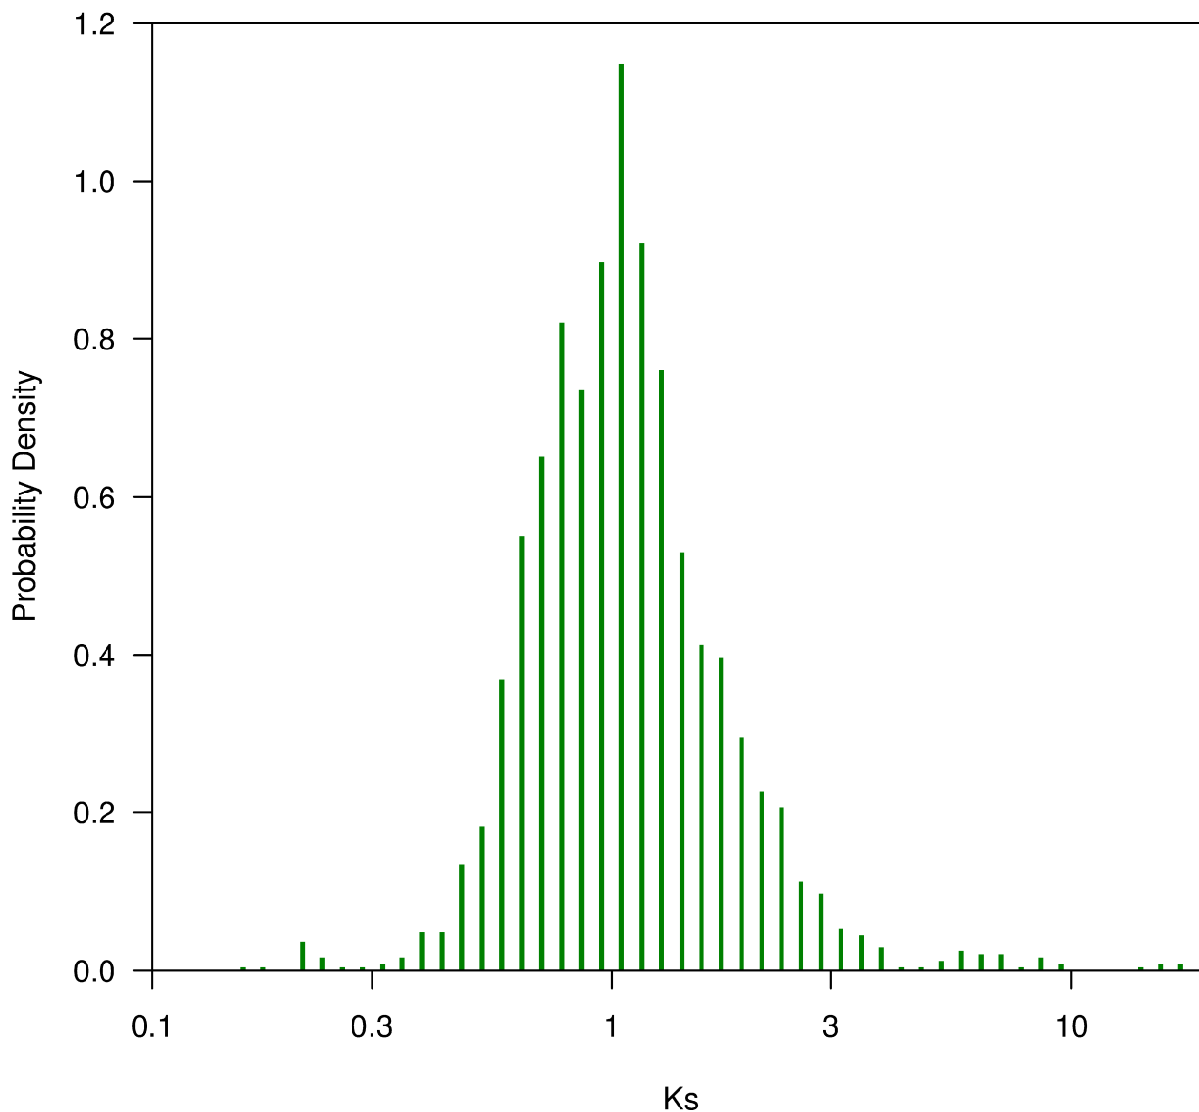

Supplemental Figure 3. Combined Ks distribution plot of Brassicaceae vs Cleomaceae species.

*Ks* distributions of each Brassicaceae species vs. *Cleome spinosa* were compared pairwise by the Kolmogorov Smirnov tests. The array of p-values from each comparison is provided in Supplemental Table 5.

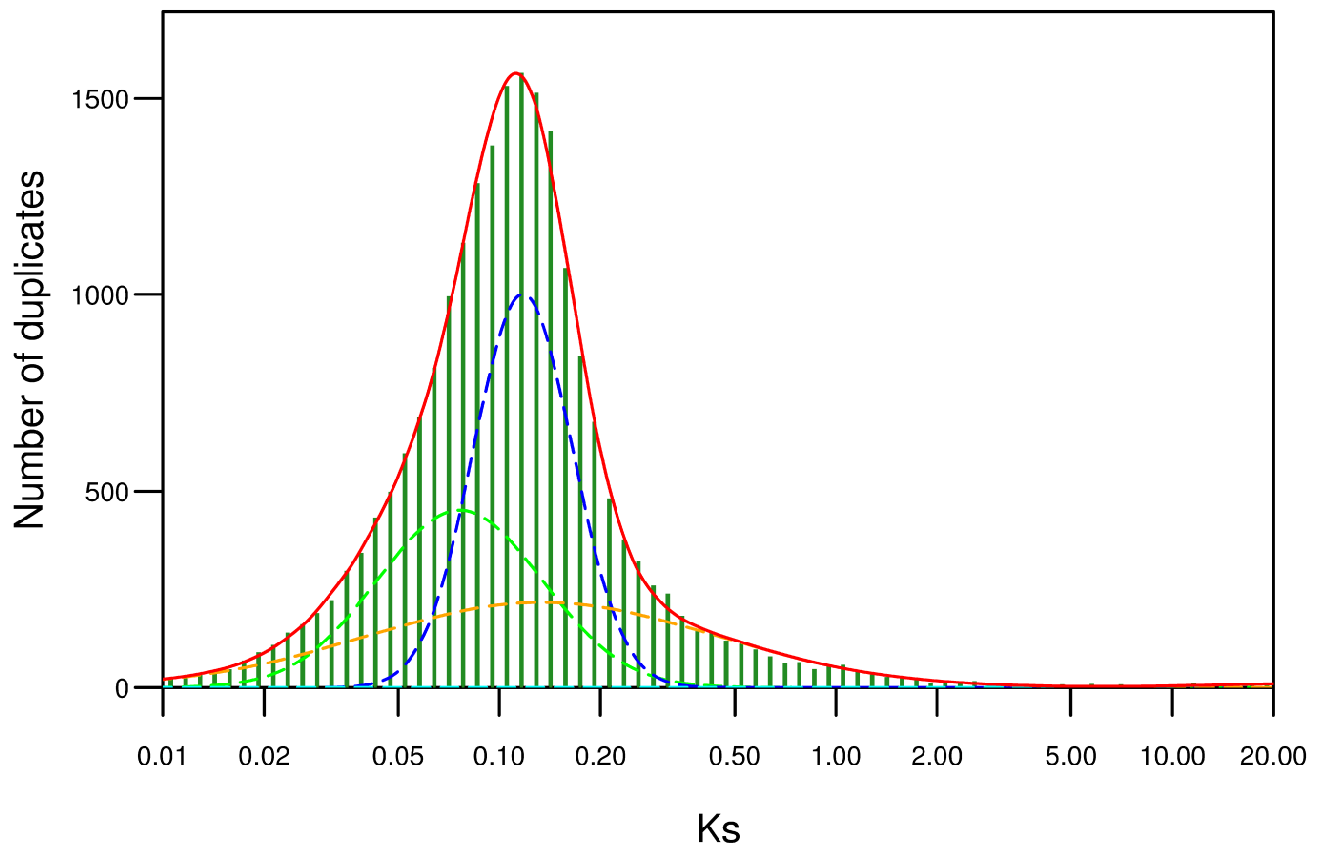

Supplemental Figure 4. Age distribution of homeologous genes in *Brassica napus*. Histogram of frequency distributions of  $K_s$  values obtained by comparing pairs of homeologous genes from *B. napus* is shown. The red line in the histogram represents mixture model fitted with normal distribution components. The dotted lines represent the individual Gaussian components.

**Supplemental Table 1: Information on the origin, life cycle, and edible and medicinal uses of the Brassicaceae species included in this study.**Information for each species was collected from "Plants for a future" website (<http://www.pfaf.org/user/default.aspx>)

| Scientific name                | Common name                  | Origin/Adaptation <sup>1</sup><br>(Geographic origin of the seeds used in this study) | Life cycle | Edible parts          | Edible uses    | Medicinal uses                                                                                                                                               | Other uses                    |
|--------------------------------|------------------------------|---------------------------------------------------------------------------------------|------------|-----------------------|----------------|--------------------------------------------------------------------------------------------------------------------------------------------------------------|-------------------------------|
| <b>Brassicaceae lineage I</b>  |                              |                                                                                       |            |                       |                |                                                                                                                                                              |                               |
| <i>Armoracia rusticana</i>     | Horseradish                  | Europe (Carmel, Saskatchewan, Canada)                                                 | Perennial  | Leaves, root, seed    | Condiment      | Antibacterial, Antirheumatic, Antiseptic, Aperient, Digestive, Diuretic, Expectorant, Rubefacient, Stimulant                                                 | Fungicide, Repellent          |
| <i>Barbarea verna</i>          | Upland cress                 | Southwestern Europe (France, Mont-Pincon)                                             | Biennial   | Leaves, seed          | Oil            |                                                                                                                                                              |                               |
| <i>Camelina sativa</i>         | False flax, Gold of pleasure | Southeastern Europe and Southwestern Asia                                             | Annual     | Oil                   | Oil            |                                                                                                                                                              |                               |
| <i>Capsella bursa-pastoris</i> | Shepherd's Purse             | Eastern Europe and Asia minor (Saskatoon, Saskatchewan, Canada)                       | Annual     | Leaves, seed          | Condiment, oil | Antiscorbutic, Astringent, Cancer, Diuretic, Emmenagogue, Haemostatic, Homeopathy, Hypotensive, Oxytoxic, Stimulant, Vasoconstrictor, Vasodilator, Vulnerary | Insecticide, Soil reclamation |
| <i>Erysimum cheiri</i>         | Aegean wallflower            | Southern Europe                                                                       | Perennial  |                       |                | Antirheumatic, Antispasmodic, Aphrodisiac, Cardiotonic, Diuretic, Emmenagogue, Expectorant, Nervine, Ophthalmic, Purgative, Resolvent                        | Essential oil                 |
| <i>Lepidium densiflorum</i>    | Common pepperweed            | North America (Carmel, Saskatchewan,                                                  | Annual     | Leaves, seed, seedpod |                | Analgesic, Kidney                                                                                                                                            |                               |

Canada)

|                                 |                         |                                                                                           |           |                    |                |                                                                                                |                   |
|---------------------------------|-------------------------|-------------------------------------------------------------------------------------------|-----------|--------------------|----------------|------------------------------------------------------------------------------------------------|-------------------|
| <i>Lepidium meyenii</i>         | Maca                    | Southern America (Between Junin and Cerro de Pasco, Peru)                                 | Perennial | Leaves, root, seed |                | Adaptogen, Aphrodisiac, Cancer, Infertility, Nutritive, Tonic.                                 |                   |
| <i>Lepidium sativum</i>         | Pepper cress            | Possibly Iran (Flensburg, Germany)                                                        | Annual    | Leaves, seed       | Condiment, oil | Antiasthmatic, Antiscorbutic, Aperient, Diuretic, Galactagogue, Poultice, Stimulant, Vitamin C | Oil for lighting  |
| <b>Brassicaceae lineage II</b>  |                         |                                                                                           |           |                    |                |                                                                                                |                   |
| <i>Cochlearia officinalis</i>   | Scurvy grass            | Coastal and mountainous regions of western, northern and central Europe (Finmark, Norway) | Biennial  | Leaves             | Salad          | Antirheumatic, Antiscorbutic, Aperient, Disinfectant, Diuretic, Stimulant, Vitamin C           | Disinfectant      |
| <i>Draba lactea</i>             | Lapland whitlow-grass   | (Kangijsujaq, Quebec, Canada)                                                             | Perennial |                    |                |                                                                                                |                   |
| <i>Isatis tinctoria</i>         | Woad                    | Central and Southern Europe (Zafferana Etnea, Sicily, Italy)                              | Biennial  | Leaves             |                | Antibacterial, Antiviral, Astringent, Cancer                                                   | Dye, Preservative |
| <i>Pringlea antiscorbutica</i>  | Kerguelen cabbage       | Antarctic regions                                                                         | Perennial | Leaves             | Condiment      | Antiscorbutic                                                                                  |                   |
| <i>Stanleya pinnata</i>         | Desert's Prince's plume | South-Western North America                                                               | Perennial | Leaves, seed       |                | Antipruritic, Odontalgic, Poultice, Tonic, Venereal disease                                    |                   |
| <i>Sisymbrium officinale</i>    | Hedge mustard           | Europe (Madrid, Spain)                                                                    | Annual    | Leaves, seed       | Condiment      | Antiaphonic, Diuretic, Expectorant, Laxative, Stomachic                                        | Soil conditioner  |
| <b>Brassicaceae lineage III</b> |                         |                                                                                           |           |                    |                |                                                                                                |                   |
| <i>Hesperis matronalis</i>      | Dame's Rocket           | Southern Europe to Siberia                                                                | Perennial | Leaves, seed       | Oil            | Diaphoretic, Diuretic                                                                          | Essential oil     |

<sup>1</sup>Origin/Adaptation indicates the suggested centre of origin for the species; in parentheses we have indicated where available the geographic region from which the seed used in this study was collected.

**Supplemental Table 2: Completely sequenced Brassicaceae genomes included in this study**

| Species                        | Genome version | Download link                                                                                                                             | Chromosome number (2n) | Genome size (Mb) | Reference                |
|--------------------------------|----------------|-------------------------------------------------------------------------------------------------------------------------------------------|------------------------|------------------|--------------------------|
| <i>Aethionema Arabicum</i>     | v1             | <a href="http://mustang.biol.mcgill.ca:8885">http://mustang.biol.mcgill.ca:8885</a>                                                       | 22                     | 249              | Haudry et al., 2013      |
| <i>Arabidopsis thaliana</i>    | TAIR10         | <a href="ftp://ftp.arabidopsis.org/home/tair/Sequences/blast_datasets/">ftp://ftp.arabidopsis.org/home/tair/Sequences/blast_datasets/</a> | 10                     | 157              | AGI, 2000                |
| <i>Arabidopsis lyrata</i>      | v1.0           | <a href="http://bioinformatics.psb.ugent.be/plaza/download/index">http://bioinformatics.psb.ugent.be/plaza/download/index</a>             | 16                     | 230              | Hu et al., 2011          |
| <i>Brassica rapa</i>           | v1.2           | <a href="http://brassicadb.org/brad/downloadOverview.php">http://brassicadb.org/brad/downloadOverview.php</a>                             | 20                     | 529              | Wang et al., 2011        |
| <i>Camelina sativa</i>         | v1.0           | <a href="http://camelinadb.ca/">http://camelinadb.ca/</a>                                                                                 | 40                     | 785              | Kagale et al, 2014       |
| <i>Capsella rubella</i>        | 183            | <a href="ftp://ftp.jgi-psf.org/pub/compgen/phytozome/v9.0/Crubella/">ftp://ftp.jgi-psf.org/pub/compgen/phytozome/v9.0/Crubella/</a>       | 16                     | 216              | Slotte et al., 2013      |
| <i>Leavenworthia alabamica</i> | v1             | <a href="http://mustang.biol.mcgill.ca:8885">http://mustang.biol.mcgill.ca:8885</a>                                                       | 22                     | 316              | Haudry et al., 2013      |
| <i>Eutrema salsugineum</i>     | 173            | <a href="ftp://ftp.jgi-psf.org/pub/compgen/phytozome/v9.0/Thalophila/">ftp://ftp.jgi-psf.org/pub/compgen/phytozome/v9.0/Thalophila/</a>   | 14                     | 260              | Yang et al., 2013        |
| <i>Schrenkiella parvula</i>    | v1.0           | <a href="http://thellungiella.org/data/">http://thellungiella.org/data/</a>                                                               | 14                     | 140              | Dassanayake et al., 2011 |

**Supplemental Table 3: Roche 454 pyrosequencing, read filtering and assembly statistics for crucifer transcriptomes**

| Species                                                 | Total reads | Total data (bp) | Filtered reads | rRNA reads | High quality reads | Clean data (bp) | Number of isogroups | Number of isotigs | Number of unigenes* | Mean length of ESTs (bp) |
|---------------------------------------------------------|-------------|-----------------|----------------|------------|--------------------|-----------------|---------------------|-------------------|---------------------|--------------------------|
| <b>Datasets generated in this study</b>                 |             |                 |                |            |                    |                 |                     |                   |                     |                          |
| <b>Brassicaceae lineage I</b>                           |             |                 |                |            |                    |                 |                     |                   |                     |                          |
| <i>Armoracia rusticana</i>                              | 318,249     | 104,158,153     | 22,731         | 1,058      | 294,460            | 99,442,871      | 32531               | 34,207            | 32531               | 453                      |
| <i>Barbarea verna</i>                                   | 509,825     | 183,003,782     | 52,262         | 914        | 456,649            | 174,042,917     | 46149               | 48,528            | 46149               | 545                      |
| <i>Camelina sativa</i>                                  | 654,329     | 184,060,228     | 565,794        | 8,556      | 512,219            | 165,779,738     | 24,679              | 41,439            | 24,679              | 600                      |
| <i>Capsella bursa-pastoris</i>                          | 636,610     | 220,415,923     | 109,385        | 1,527      | 525,698            | 196,538,174     | 29299               | 43,787            | 29299               | 632                      |
| <i>Erysimum cheiri</i>                                  | 728,351     | 260,045,141     | 153,434        | 192,842    | 382,075            | 137,476,277     | 20776               | 21,464            | 20776               | 691                      |
| <i>Lepidium densiflorum</i>                             | 698,260     | 284,386,448     | 132,104        | 162,879    | 403,277            | 162,145,782     | 24433               | 27,944            | 24433               | 749                      |
| <i>Lepidium meyenii</i>                                 | 317,304     | 102,937,822     | 24,252         | 682        | 292,370            | 99,008,125      | 28872               | 33,153            | 28872               | 505                      |
| <i>Lepidium sativum</i>                                 | 710,869     | 299,571,617     | 198,476        | 291,563    | 220,830            | 91,156,777      | 14372               | 16,021            | 14372               | 661                      |
| <b>Brassicaceae lineage II</b>                          |             |                 |                |            |                    |                 |                     |                   |                     |                          |
| <i>Cochlearia officinalis</i>                           | 459,753     | 156,072,854     | 36,870         | 1,888      | 420,995            | 146,823,218     | 26839               | 28,798            | 26839               | 570                      |
| <i>Draba lactea</i>                                     | 657,265     | 268,755,563     | 69,411         | 26,470     | 561,384            | 236,452,279     | 33575               | 53,470            | 33575               | 712                      |
| <i>Isatis tinctoria</i>                                 | 405,425     | 129,872,098     | 29,526         | 1,180      | 374,719            | 123,431,242     | 30803               | 32,534            | 30803               | 510                      |
| <i>Pringlea antiscorbutica</i>                          | 582,473     | 151,334,384     | 151,097        | 22,826     | 408,550            | 130,506,889     | 27788               | 50,539            | 27788               | 384                      |
| <i>Sisymbrium officinale</i>                            | 499,983     | 198,655,081     | 48,334         | 1,785      | 449,864            | 183,634,013     | 38819               | 41,307            | 38819               | 603                      |
| <i>Stanleya pinnata</i>                                 | 695,764     | 264,587,372     | 87,488         | 74,359     | 533,917            | 205,625,358     | 32009               | 43,785            | 32009               | 564                      |
| <b>Brassicaceae lineage III</b>                         |             |                 |                |            |                    |                 |                     |                   |                     |                          |
| <i>Hesperis matronalis</i>                              | 735,348     | 307,895,442     | 181,784        | 275,439    | 278,125            | 114,214,311     | 16251               | 17,230            | 16251               | 737                      |
| <b>Datasets downloaded from NCBI short read archive</b> |             |                 |                |            |                    |                 |                     |                   |                     |                          |
| <i>Cleome spinosa</i>                                   | 313,805     | 70,564,588      | 67,509         | 781        | 245,515            | 58,658,138      | 19,328              | 19,406            | 19,328              | 343                      |
| <i>Cleome gynandra</i>                                  | 402,668     | 91,851,141      | 76,809         | 277        | 325,582            | 78,432,152      | 20,543              | 20,705            | 20,543              | 369                      |

\*Non-redundant ESTs



**Supplemental Table 4: Estimated ages of the inferred major WGD events in Brassicaceae species**

| Species                        | Mode and mean <i>K<sub>S</sub></i> of mixture model components |      |              |      |             |      |               | Estimated maximum age (Mya)** |              |             |
|--------------------------------|----------------------------------------------------------------|------|--------------|------|-------------|------|---------------|-------------------------------|--------------|-------------|
|                                | Recent WGD                                                     |      | $\alpha$ WGD |      | $\beta$ WGD |      | $\gamma$ WGD* | Recent WGD                    | $\alpha$ WGD | $\beta$ WGD |
|                                | Mode                                                           | Mean | Mode         | Mean | Mode        | Mean | Mean          |                               |              |             |
| <b>Brassicaceae lineage I</b>  |                                                                |      |              |      |             |      |               |                               |              |             |
| <i>Arabidopsis thaliana</i>    | --                                                             | --   | 0.75         | 0.8  | 2.30        | 2.26 | 7.16          | --                            | 48.66        | 137.2       |
| <i>Arabidopsis lyrata</i>      | --                                                             | --   | 0.78         | 0.8  | 2.06        | 1.88 | 6.05          | --                            | 48.83        | 114.47      |
| <i>Armoracia rusticana</i>     | 0.15                                                           | 0.15 | 0.71         | 0.69 | 1.97        | 1.93 | 11.86         | 9.36                          | 41.88        | 117.62      |
| <i>Barbarea verna</i>          | --                                                             | --   | 0.76         | 0.75 | 2.30        | 2.3  | 9.65          | --                            | 45.7         | 140.12      |
| <i>Camelina sativa</i>         | --                                                             | 0.11 | --           | 0.82 | --          | 2.04 | 7.21          | 5.41                          | 45.93        | 124.46      |
| <i>Capsella bursa-pastoris</i> | --                                                             | 0.15 | 0.78         | 0.76 | 2.32        | 2.2  | 7.51          | 9.12                          | 46           | 133.55      |
| <i>Capsella rubella</i>        | --                                                             | --   | --           | 0.64 | --          | 2.31 | 7.12          | --                            | 39.10        | 140.51      |
| <i>Erysimum cheiri</i>         | --                                                             | --   | 0.74         | 0.75 | 2.18        | 2.07 | 4.17          | --                            | 45.44        | 125.8       |
| <i>Leavenworthia alabamica</i> | --                                                             | 0.33 | --           | 0.91 | --          | --   | --            | 20.07                         | 55.35        | --          |
| <i>Lepidium densiflorum</i>    | 0.17                                                           | 0.18 | 0.91         | 0.9  | 2.56        | 2.42 | 7.94          | 10.9                          | 54.5         | 147.09      |
| <i>Lepidium meyenii</i>        | 0.16                                                           | 0.16 | 0.87         | 0.86 | 1.79        | 1.82 | 13.71         | 10.03                         | 52.51        | 110.59      |
| <i>Lepidium sativum</i>        | 0.16                                                           | 0.17 | 0.96         | 0.9  | 2.37        | 2.32 | 9.43          | 10.21                         | 54.72        | 141.2       |
| <b>Brassicaceae lineage II</b> |                                                                |      |              |      |             |      |               |                               |              |             |
| <i>Brassica rapa</i>           | 0.36                                                           | 0.38 | 0.92         | 0.92 | 2.07        | 2.03 | 6.24          | 23.13                         | 56           | 123.22      |
| <i>Cochlearia officinalis</i>  | --                                                             | --   | 0.61         | 0.62 | 1.72        | 1.77 | 4.53          | --                            | 37.88        | 107.77      |
| <i>Draba lactea</i>            | 0.13                                                           | 0.14 | 0.79         | 0.74 |             | 1.83 | 6.43          | 8.43                          | 44.97        | 111.48      |
| <i>Isatis tinctoria</i>        | --                                                             | --   | 0.73         | 0.73 | 2.01        | 2.06 | 7.82          | --                            | 44.13        | 125.1       |
| <i>Pringlea antiscorbutica</i> | 0.17                                                           | 0.17 | 0.75         | 0.76 | 1.90        | 1.93 | 11.2          | 10.22                         | 46.07        | 117.39      |
| <i>Sisymbrium officinale</i>   | --                                                             | --   | 0.77         | 0.76 | 2.04        | 2.03 | 8.5           | --                            | 46.12        | 123.67      |
| <i>Stanleya pinnata</i>        | 0.19                                                           | 0.19 | 0.73         | 0.73 | 2.09        | 2.01 | 9.19          | 11.65                         | 44.48        | 122.53      |
| <i>Eutrema salsugineum</i>     | --                                                             | --   | --           | 0.74 | --          | 2.20 | 6.32          | --                            | 45.02        | 133.82      |
| <i>Schrenkiella parvula</i>    | --                                                             | --   | --           | 0.77 | --          | 2.23 | 5.11          | --                            | 46.83        | 135.64      |

|                                 |      |      |      |      |      |      |      |       |       |        |
|---------------------------------|------|------|------|------|------|------|------|-------|-------|--------|
| <b>Brassicaceae lineage III</b> |      |      |      |      |      |      |      |       |       |        |
| <i>Hesperis matronalis</i>      | --   | --   | 0.72 | 0.72 | 2.33 | 2.23 | 7.02 | --    | 44.07 | 135.54 |
| <b>BasalGroup</b>               |      |      |      |      |      |      |      |       |       |        |
| <i>Aethionema arabicum</i>      | --   | --   | --   | 0.77 | --   | 2.39 | 5.75 | --    | 46.83 | 145.37 |
| <b>Cleomaceae</b>               |      |      |      |      |      |      |      |       |       |        |
| <i>Cleome spinosa</i>           | 0.41 | 0.4  |      | 0.67 | 1.95 | 1.95 | 3.77 | 24.05 | 40.75 | 118.56 |
| <b>Caricaceae</b>               |      |      |      |      |      |      |      |       |       |        |
| <i>Carica papaya</i>            | 0.17 | 0.15 |      | --   | 2.01 | 1.96 | 4.58 | --    | --    | 119.41 |

\*Peak associated with  $\gamma$  WGD was not visible and hence no mode values were calculated

\*\*Calculated based on mixture model mean  $\ln(Ks)$  values

**Supplemental Table 5: Significance of pairwise comparison of orthologous *Ks* distributions between *Cleome spinosa* and diverse Brassicaceae species**

Orthologous *Ks* distributions of each Brassicaceae species vs. *Cleome spinosa* were compared in pairwise manner by the Kolmogorov Smirnov tests. The array of p-values from each comparison is provided.

|                          | <i>A. thaliana</i> | <i>P. antiscorbutica</i> | <i>C. bursa-pastoris</i> | <i>D. lactea</i> | <i>I. tinctoria</i> | <i>C. officinalis</i> | <i>A. rusticana</i> | <i>L. meyenii</i> | <i>L. densiflorum</i> | <i>H. matronalis</i> | <i>S. pinnata</i> | <i>L. sativum</i> | <i>S. officinale</i> | <i>B. verna</i> |
|--------------------------|--------------------|--------------------------|--------------------------|------------------|---------------------|-----------------------|---------------------|-------------------|-----------------------|----------------------|-------------------|-------------------|----------------------|-----------------|
| <i>A. thaliana</i>       |                    |                          |                          |                  |                     |                       |                     |                   |                       |                      |                   |                   |                      |                 |
| <i>P. antiscorbutica</i> | 0.0898             |                          |                          |                  |                     |                       |                     |                   |                       |                      |                   |                   |                      |                 |
| <i>C. bursa-pastoris</i> | 0.8107             | 0.0518                   |                          |                  |                     |                       |                     |                   |                       |                      |                   |                   |                      |                 |
| <i>D. lactea</i>         | 0.3529             | 0.0268                   | 0.9680                   |                  |                     |                       |                     |                   |                       |                      |                   |                   |                      |                 |
| <i>I. tinctoria</i>      | 0.2364             | 0.6988                   | 0.2962                   | 0.1646           |                     |                       |                     |                   |                       |                      |                   |                   |                      |                 |
| <i>C. officinalis</i>    | 0.0015             | 2.41E-06                 | 0.0011                   | 0.0084           | 6.31E-06            |                       |                     |                   |                       |                      |                   |                   |                      |                 |
| <i>A. rusticana</i>      | 0.2596             | 0.5135                   | 0.2596                   | 0.2387           | 0.7623              | 1.66E-05              |                     |                   |                       |                      |                   |                   |                      |                 |
| <i>L. meyenii</i>        | 0.4543             | 0.0446                   | 0.8395                   | 0.5807           | 0.0537              | 0.02530               | 0.1493              |                   |                       |                      |                   |                   |                      |                 |
| <i>L. densiflorum</i>    | 0.3231             | 0.0047                   | 0.4010                   | 0.6193           | 0.0083              | 0.10800               | 0.0624              | 0.7760            |                       |                      |                   |                   |                      |                 |
| <i>H. matronalis</i>     | 0.2993             | 0.3390                   | 0.3483                   | 0.2251           | 0.7673              | 1.33E-05              | 0.7119              | 0.1509            | 0.0201                |                      |                   |                   |                      |                 |
| <i>S. pinnata</i>        | 0.3232             | 0.7882                   | 0.3004                   | 0.1648           | 0.9361              | 1.92E-05              | 0.7341              | 0.09019           | 0.0081                | 0.9116               |                   |                   |                      |                 |
| <i>L. sativum</i>        | 0.3967             | 0.0232                   | 0.4328                   | 0.8848           | 0.0278              | 0.06504               | 0.06905             | 0.9649            | 0.9873                | 0.0471               | 0.0657            |                   |                      |                 |
| <i>S. officinale</i>     | 0.8896             | 0.1390                   | 0.9609                   | 0.6866           | 0.4798              | 0.001887              | 0.7982              | 0.6210            | 0.1490                | 0.5412               | 0.4874            | 0.3232            |                      |                 |
| <i>B. verna</i>          | 0.5173             | 0.0830                   | 0.6872                   | 0.3391           | 0.4295              | 6.45E-05              | 0.6912              | 0.3226            | 0.0765                | 0.9617               | 0.5233            | 0.1733            | 0.867                |                 |
| <i>E. cheiri</i>         | 0.7690             | 0.2566                   | 0.7023                   | 0.2060           | 0.2350              | 0.001178              | 0.4350              | 0.4404            | 0.2694                | 0.2205               | 0.4320            | 0.3160            | 0.811                | 0.4281          |
